# Supplementary material for: Surface and Structural Properties of Medical Acrylonitrile Butadiene Styrene Modified with Silver Nanoparticles
Source: MDPI journal article supplement (doi:10.3390/polym12010197), 2020-01-12
Supplement: s1 [file s1]

## Supplementary Material

# Surface and Structural Properties of Medical Acrylonitrile Butadiene Styrene Modified with Silver Nanoparticles

Magdalena Ziabka <sup>1,\*</sup>, Michał Dziadek <sup>2,3</sup> and Kinga Pielichowska <sup>4</sup>

<sup>1</sup> AGH University of Science and Technology, Faculty of Materials Science and Ceramics, Department of Ceramics and Refractories, Krakow 30-059, Poland

<sup>2</sup> AGH University of Science and Technology, Faculty of Materials Science and Ceramics, Department of Glass Technology and Amorphous Coatings, Krakow 30-059, Poland; dziadek@agh.edu.pl

<sup>3</sup> Jagiellonian University, Faculty of Chemistry, Krakow 30-387, Poland

<sup>4</sup> AGH University of Science and Technology, Faculty of Materials Science and Ceramics, Department of Biomaterials and Composites, Krakow 30-059, Poland; kingapie@agh.edu.pl

\* Correspondence: ziabka@agh.edu.pl; Tel.: +48-012-617-2523

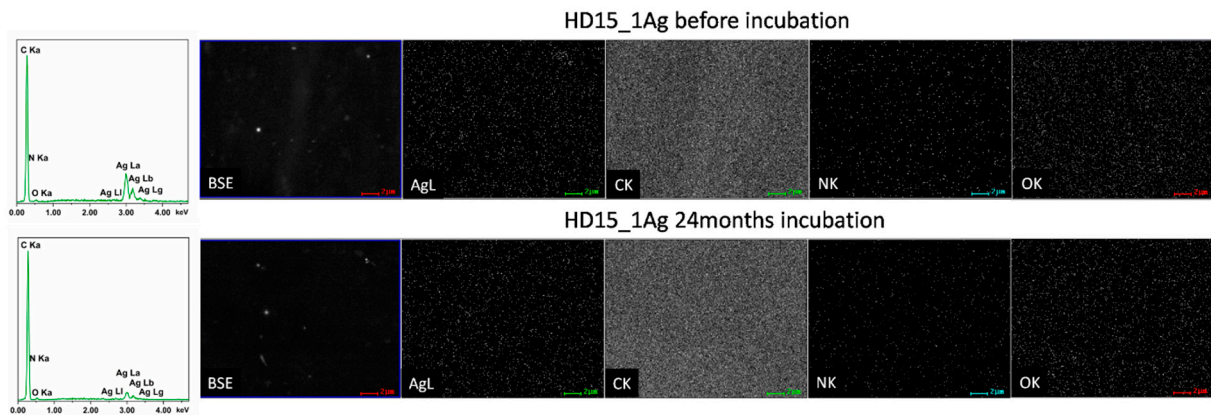

**Figure S1.** Spectrum and mapping analysis of HD15 polymer containing 1 wt.% of silver nanoparticles (AgNPs) before and 24 months of incubation.
